1 **Single-cell transcriptome analysis reveals cell-cell communication and thyrocyte**  
2 **diversity in the zebrafish thyroid gland.**

3 Pierre Gillotay<sup>1</sup>, Meghna Shankar<sup>1</sup>, Sema Elif Eski<sup>1</sup>, Susanne Reinhardt<sup>2</sup>, Annekathrin  
4 Kränkel<sup>2</sup>, Juliane Bläsche<sup>2</sup>, Andreas Petzold<sup>2</sup>, Gokul Kesavan<sup>3</sup>, Christian Lange<sup>3</sup>,  
5 Michael Brand<sup>3</sup>, Vincent Detours<sup>1</sup>, Sabine Costagliola<sup>1\*</sup>, Sumeet Pal Singh<sup>1\*</sup>

6  
7 <sup>1</sup> IRIBHM, Université Libre de Bruxelles (ULB), Route de Lennik 808, 1070 Brussels,  
8 Belgium.

9 <sup>2</sup> DRESDEN-concept Genome Center, DFG NGS Competence Center, c/o Center for  
10 Molecular and Cellular Bioengineering, TU Dresden, Dresden, 01307, Germany

11 <sup>3</sup> Center for Molecular and Cellular Bioengineering, TU Dresden, Dresden, 01307,  
12 Germany.

13 \* Corresponding authors: [scostag@ulb.ac.be](mailto:scostag@ulb.ac.be); [sumeet.pal.singh@ulb.ac.be](mailto:sumeet.pal.singh@ulb.ac.be)

14 **Abstract**

15 The thyroid gland regulates growth and metabolism via production of thyroid hormone in  
16 follicles composed of thyrocytes. So far, thyrocytes have been assumed to be a  
17 homogenous population. To uncover genetic heterogeneity in the thyrocyte population,  
18 and molecularly characterize the non-thyrocyte cells surrounding the follicle, we  
19 developed a single-cell transcriptome atlas of the zebrafish thyroid gland. The 6249-cell  
20 atlas includes profiles of thyrocytes, blood vessels, lymphatic vessels, immune cells and  
21 fibroblasts. Further, the thyrocytes could be split into two sub-populations with unique  
22 transcriptional signature, including differential expression of the transcription factor  
23 *pax2a*. To validate thyrocyte heterogeneity, we generated a CRISPR/Cas9-based  
24 *pax2a* knock-in line, which demonstrated specific *pax2a* expression in the thyrocytes.  
25 However, a population of *pax2a*-low mature thyrocytes interspersed within individual  
26 follicles could be distinguished, corroborating heterogeneity within the thyrocyte  
27 population. Our results identify and validate transcriptional differences within the  
28 nominally homogenous thyrocyte population.

29 **Keywords**

30 Single-cell, transcriptomics, zebrafish, heterogeneity, thyroid gland, thyroid follicular  
31 cells, connective septa, CRISPR/Cas9, knock-in

32 **One-line summary**

33 Single-cell analysis uncovers latent heterogeneity in thyroid follicular cells.

34 **Graphical Abstract**

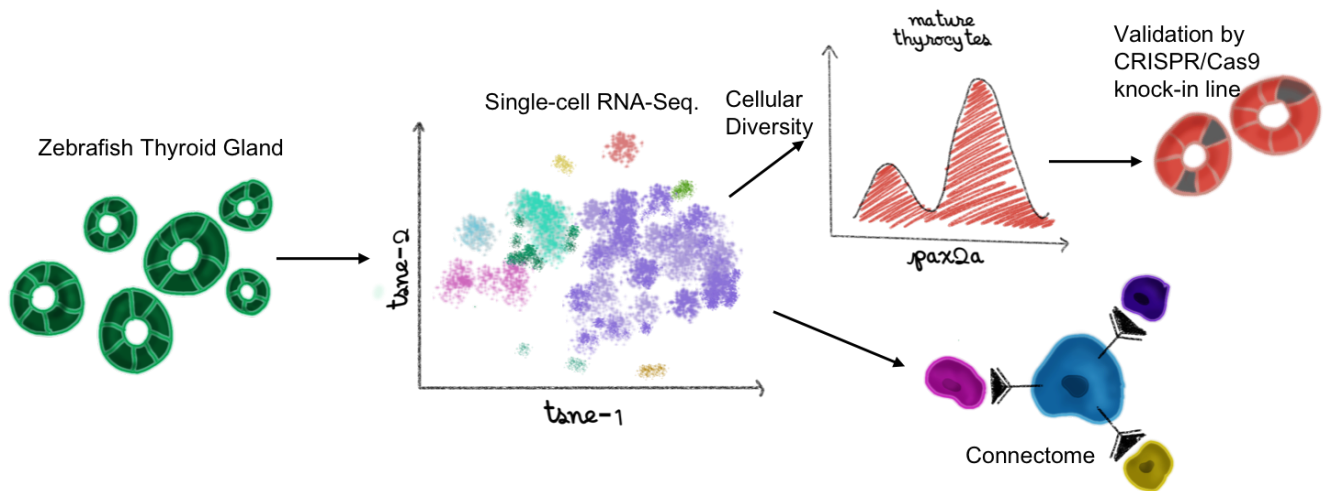

35

## 36 **Introduction**

37           The thyroid gland produces hormones thyroxine (T4) and triiodothyronine (T3)  
38 that regulate body metabolism, growth, and development. Thyroid dysfunction, a  
39 disease afflicting almost 100 million people worldwide (1), is common and treatable by  
40 hormone replacement. If left untreated, however, it may result in profound adverse  
41 effects on the human body, including mental retardation, goiter or dwarfism.

42           The thyroid gland is an endocrine organ with an intricate structure enabling  
43 production, storage and release of the thyroid hormones. It contains numerous variable-  
44 sized spherical follicles composed of thyroid follicular epithelial cells, or thyrocytes. The  
45 thyrocytes generate the thyroid hormones in a multi-step process. They secrete and  
46 store thyroglobulin (TG) in the lumen of the follicles. Additionally, they intake iodide from  
47 the blood via sodium-iodide symporter (NIS / Slc5a5). At the interface between  
48 thyrocytes and the lumen, thyroid peroxidase (TPO) expressed by the cells catalyzes  
49 the coupling of iodide to tyrosyl residues of thyroglobulin (TG). Iodinated TG is absorbed  
50 back into the thyrocyte and cleaved by cysteine proteases in lysosomes to form T4 and  
51 T3 (2). Though the machinery responsible for the production of thyroid hormones by  
52 thyrocytes is well established, it remains unknown if all the thyrocytes resident in the  
53 thyroid gland are equally capable of generating thyroid hormones. In other words, the  
54 extent of molecular homogeneity between individual thyrocytes has not yet been  
55 investigated.

56           Additionally, the thyroid gland contains many cell-types with potential roles in  
57 modulating thyrocyte functionality. The gland contains an extensive distribution of blood  
58 vessels, which carry iodide to the thyrocytes and carry thyroid hormones away from

59 them. The thyroid follicles are separated by a mesenchymal cell population, called  
60 connective tissue septa, which also divides the gland into lobules. The mammalian  
61 thyroid gland also contains parafollicular epithelial cells, or C-cells, that synthesize and  
62 secrete the hormone calcitonin. These parafollicular epithelial cells are, however,  
63 located outside the thyroid gland in fish and amphibians (3). Further, the presence of  
64 immune cells and innervation has been demonstrated within the thyroid gland (4, 5).  
65 Though we have a considerable understanding of these cell-types on a histological  
66 level, we still lack the molecular characterization of the thyroid gland cell ensemble. This  
67 extends to an incomplete appreciation of the impact of the diverse cell-populations on  
68 thyroid follicular cell physiology.

69         To uncover the diversity within the thyrocyte population, and further characterize  
70 the surrounding tissue at cellular resolution, we develop the first atlas of the thyroid  
71 gland at single-cell resolution. For this, we build on the progress in single-cell  
72 transcriptomics (6) to transcriptionally profile thousands of individual cells isolated from  
73 the thyroid gland of adolescent and adult zebrafish. We demonstrate that these profiles  
74 comprehensively represent the cells present in the zebrafish thyroid gland. Further, we  
75 demonstrate the segregation of thyrocytes into two transcriptionally distinct sub-  
76 populations. Utilizing the expression profiles of discrete cell populations, we build an  
77 intercellular signaling network to uncover communication between thyrocytes and the  
78 surrounding tissue. Finally, to enable easy access to the data, we have made the  
79 zebrafish thyroid gland atlas available for online browsing.

## 80 **Results**

### 81 **Single-cell transcriptomics of the zebrafish thyroid gland.**

82 To generate the molecular catalogue of the thyroid gland at cellular resolution,  
83 we sampled the organ from two ages of zebrafish: 2 month post-fertilization (mpf) and 8  
84 mpf (Supp. Figure 1). The time points span adolescent to adult transition in zebrafish,  
85 with animals containing fully differentiated functional organs at both stages. By 2 mpf,  
86 the adolescent animals have completed morphogenesis, but are yet to reach sexual  
87 maturity. The animals sampled at 2 mpf were on average 2.6 cm in length and 123.8 mg  
88 in weight. In contrast, fish at 8 mpf are sexually mature adults, with an average length of  
89 3.5 cm and an average weight of 294.4 mg (Supp. Figure 1). To characterize the organ  
90 cell-types in an unbiased manner, we dissected out the entire thyroid gland (Fig. 1A, B)  
91 from six animals at each stage, and prepared the single-cell suspension for cDNA  
92 library preparation. To guide thyroid gland dissection, we utilized the *Tg(tg:nls-mVenus-*  
93 *T2A-NTR)* zebrafish reporter line (7) that labels thyrocytes with bright yellow fluorescent  
94 protein (Fig. 1B'). The micro-dissected tissue was dissociated using enzymatic  
95 digestion. The single-cell suspension was stained with calcein, which specifically labels  
96 live cells with blue fluorescence. The live cells were then enriched using FACS (Supp.  
97 Figure 2) to limit false positive signals from dead and/or ruptured cells (8). Twelve  
98 thousand live-cells, pooled from six animals, were collected in separate tubes according  
99 to age and profiled using droplet-based high-throughput single-cell RNA-sequencing  
100 provided by 10X Genomics (9, 10). The 10X Genomics pipeline uses molecule and cell-  
101 specific barcoding allowing transcript quantification without amplification bias (11, 12).  
102 Using the Cell Ranger bioinformatics pipelines, the resulting Next-Generation

103 Sequencing libraries were mapped to the zebrafish genome, de-multiplexed according  
104 to their cellular barcodes and quantified to generate gene/cell UMI (unique molecular  
105 identifier) count tables. Quality-based exclusion of single-cell transcriptomes was  
106 implemented based on mean library size, percentage of mitochondrial reads and  
107 number of genes detected per cell. On average, we detected 6012 UMIs and 1303  
108 genes per cell (Supp. Figure 3). The process recovered in total 6249 cells, providing  
109 single-cell transcriptomic profiles for 2986 and 3263 individual cells for 2 mpf and 8 mpf,  
110 respectively.

### 111 **Identification of cell-types present in the zebrafish thyroid gland.**

112 To aid with visualization of the zebrafish thyroid gland single-cell RNA-Seq  
113 (scRNA-Seq) data, we projected the cellular profiles onto t-distributed stochastic  
114 neighbor embedding (t-SNE) plots, a non-linear dimensionality reduction technique (13)  
115 (Fig. 1C). Using unsupervised graph-based clustering, we identified seven clusters for  
116 the thyroid gland. Using the expression of genes involved in thyroid hormone  
117 production, we could identify one of the clusters as thyroid follicular cells (Fig. 1D – F).  
118 The cluster, labeled as thyrocytes, contains 267 cells.

119 To define the identity of the remaining cell clusters, we generated cluster-specific  
120 marker genes by performing differential gene expression analysis (Fig. 2A) (Supp.  
121 Table 1). For four clusters, the marker genes included one or more known cell type–  
122 specific identifiers. This included *gpr182* for endothelial cells; *acta2* for musculature;  
123 *fcgr1gl* for immune cells; and *ponzr3* for cells from zebrafish gills (Fig. 2B – E). Based  
124 on these cell identifiers, the atlas includes 233 endothelial cells, 135 muscle lineage  
125 cells, 914 immune cells and 199 cells from zebrafish gills. Notably, the endothelial cell

126 cluster includes blood vessels (*flt1* and *kdrl*) and lymphatic vessels (*mrc1a*, *prox1a*, *flt4*  
127 and *lyve1b*) (Supp. Fig. 4); while the immune cell cluster includes macrophages  
128 (*mpeg1.1* and *mfap4*), neutrophils (*lyz*) and lymphocytes (*il4*, *il13* and *il11b*) (Supp. Fig.  
129 5).

130 For the remaining two clusters (number six and seven), we identified marker  
131 genes that hinted towards identity of the cell-type. Specifically, *col1a2* and *tp63*  
132 enriched in cluster number six and seven respectively (Fig. 2 F – G), are known  
133 markers of fibroblasts (14, 15) and epithelial tissue (16–18). We performed gene-  
134 ontology (GO) enrichment analysis of the marker genes to aid with classification (Supp.  
135 Fig. 6). Cluster six demonstrated an enrichment of ‘extracellular matrix structural  
136 constituent’, ‘connective tissue development’ and ‘extracellular space’, confirming the  
137 presence of tissue fibroblasts in this cluster. Thus, we labelled cluster six as ‘Stromal’  
138 cells. Cluster seven displayed an enrichment of ‘cell motility’, ‘cell migration’ and  
139 ‘epithelium development’, suggestive of epithelial cells. Hence, we labelled cluster  
140 seven as ‘Non-Follicular Epithelium (NFE)’, to distinguish them from the thyroid follicular  
141 epithelial cells. Our data contains 3670 stromal cells and 831 non-follicular epithelial  
142 cells.

143 Our marker gene identification further established additional genes enriched in a  
144 single cell-type in the thyroid gland (Fig. 2A) (Supp. Table 1). For instance, we identified  
145 *cx30.3*, a connexin gene and *prdx1*, a gene involved in the antioxidant response, to be  
146 specifically expressed in the thyrocytes. To enable further investigation of the clusters  
147 and gene expression profiles, we have developed an interactive webtool for online  
148 browsing (<https://sumeet.shinyapps.io/zfthyroid/>).

149 **Development of autocrine and paracrine signaling networks in the thyroid gland**  
150 **using known ligand-receptor interactions.**

151 Having defined the cell types of the thyroid gland, we quantified potential cell-cell  
152 interactions between thyrocytes and all cell types present in the organ (Fig. 3A) based  
153 on a reference list of approximately 3,100 literature-supported interactions containing  
154 receptors and ligands from receptor tyrosine kinase (RTK), extracellular matrix (ECM)-  
155 integrin, chemokine and cytokine families (19). Although anatomical barriers between  
156 cell types are not modeled in this analysis, expression patterns of ligand-receptor pairs  
157 revealed a dense intercellular communication network (Fig. 3B). The network consisted  
158 of 322 ligands expressed on different cell-types with a corresponding receptor  
159 expressed on the thyrocytes (Supp. Table 2). For instance, the stromal cells express the  
160 ligand *lpl* (Lipoprotein Lipase) that signals through the *lrp2a* (zebrafish homologue of  
161 Megalin) receptor (Fig. 3C). Stromal and muscle cells express *dcn* (Decorin) whose  
162 receptor *met* is expressed by thyrocytes. Further, the ligand *cyr61* is broadly expressed  
163 in the thyroid gland, with one of its receptors, *itgb5*, an integrin isoform, expressed  
164 specifically by the thyrocytes. The identified interactions also include autocrine  
165 signaling. For example, the ligand *sema3b* and its receptor *nrp2a* are both present on  
166 thyrocytes. GO-analysis for identified ligand-receptor pairs revealed genes involved in  
167 'PI3K-Akt signaling pathway', 'MET signaling' and 'integrin binding' (Supp. Fig. 7).

168 **Thyrocytes are composed of transcriptionally distinct sub-populations.**

169 Next, we characterized the transcriptional differences within the thyrocyte  
170 population. For this, we bioinformatically isolated the thyrocytes, and re-performed the



171 clustering pipeline on the isolated cell population. With this, we could segregate the  
172 thyrocytes into two smaller clusters (Fig. 4A), labeled as 'Cluster\_Blue' and  
173 'Cluster\_Red'. The two clusters displayed differences in the expression levels of 265  
174 genes (Fig. 4B) (Supp. Table 3). Notably, Cathepsin B (*ctspa*) is significantly  
175 downregulated in the blue cluster (Fold change = 1.6, p-value =  $1.47 \times 10^{-9}$ ) (Fig. 4B –  
176 C). Cathepsin B is a cysteine protease that is involved in the processing of iodinated  
177 thyroglobulin to T4 and T3 in the thyrocyte lysosomes (2, 20). Moreover, fusion of  
178 Cathepsin B and EGFP has been previously used to track thyroid hormone processing  
179 lysosomes in rat thyroid epithelial cell lines (21).

180 Along with higher expression of Cathepsin B, the red cluster displayed significant  
181 downregulation of *pax2a* expression (Fold change = 1.7, p-value =  $8.24 \times 10^{-9}$ ) (Fig. 4B-  
182 C). *pax2a* belongs to the PAX (paired box DNA-binding) domain containing family of  
183 transcription factors. The loss of *pax2a* expression in the red cluster is notable, as  
184 *pax2a* is an important regulator of thyrocyte development (22). Zebrafish thyroid  
185 primordium expresses *pax2a* at 24 hpf (22), which is required for specification of the  
186 thyroid follicles (23, 24). Consequently, zebrafish lacking *pax2a* fail to develop thyroid  
187 follicles (22), which is similar to the Pax8 knock-out phenotype in mouse (25). The low  
188 expression of *pax2a* in the red cluster, without a difference in *tg* expression, suggests  
189 the presence of a thyrocyte sub-population with a distinct gene expression signature.

## 190 **Generation of *pax2a* knock-in reporter line.**

191 To validate the heterogeneity among the zebrafish thyrocytes, we focused on the  
192 expression of *pax2a* transcription factor. We generated a knock-in line by inserting  
193 monomeric Kusabira Orange 2 (mKO2) fluorescent protein to the 3' end of the

194 endogenous *pax2a* genomic location (Fig. 5A). The *pax2a<sup>pax2a-T2A-mKO2</sup>* (abbreviated as  
195 *pax2a<sup>mKO2</sup>*) reporter expression perfectly overlapped with PAX2A antibody staining at 9.5  
196 hours post-fertilization (Fig. 5B). Moreover, the knock-in line displayed mKO2  
197 fluorescence in the otic vesicle, mid-hindbrain boundary, optic stalk, pronephros and the  
198 thyroid gland (Fig. 5C – F, Supp. Movie 1), mimicking known expression of *pax2a* during  
199 zebrafish development (26). Additionally, in order to assess whether the dynamics of  
200 mKO2 expression would follow modifications in the expression of endogenous *pax2a*, we  
201 used CRISPR/Cas9 technology to generate F0 knock-outs (also known as Crispant (27))  
202 of *pax2a* gene in our *pax2a<sup>mKO2</sup>* line. The crispants displayed defects in thyroid  
203 morphogenesis (Fig. 8G – H), mimicking the phenotype of *pax2a* loss-of-function  
204 mutation (22). Live imaging of crispants at 55 hpf revealed strong decrease of mKO2  
205 expression (Fig. 8G – H), thereby corroborating the faithful recapitulation of *pax2a*  
206 expression by the newly generated reporter line.

### 207 **Segregation of thyrocyte sub-populations based on *pax2a* reporter expression.**

208 Upon investigating the fluorescence expression of the *pax2a* reporter in the  
209 thyroid gland of adult zebrafish, we found strong and specific expression of *pax2a*  
210 reporter in the thyrocytes lining the thyroid follicles (Fig. 6A – D). Although a majority of  
211 thyrocytes displayed uniform expression of *pax2a* reporter, we could identify a small  
212 population of *pax2a<sup>mKO2</sup>*-Low thyrocytes (Fig. 6B – D). The *pax2a<sup>mKO2</sup>*-Low thyrocytes  
213 were not segregated, but scattered throughout the gland, thereby suggesting a mixing  
214 of the two thyrocyte sub-populations.

215 To quantify the proportions of *pax2a<sup>mKO2</sup>*-Low and -High thyrocytes, we  
216 performed FACS analysis on *pax2a<sup>mKO2</sup>; Tg(tg:nls-EGFP)* double transgenic line (Fig.

217 6E – G). The *Tg(tg:nls-EGFP)* zebrafish line labels the thyrocyte population in green  
218 fluorescence (27). We restricted our analysis to the thyrocyte population by gating for  
219 GFP+ cells in the thyroid gland (Fig. 6E). Within the thyrocyte population, the cells  
220 displayed a normal distribution of GFP fluorescence; however, thyrocytes could be split  
221 into two sub-populations based on the levels of *pax2a* reporter expression (Fig. 6F – G).  
222 Specifically, 75% of thyrocytes (202 out of 268 cells) displayed *pax2a*<sup>mKO2</sup>-High  
223 fluorescence, while 25% of thyrocytes (66 out of 268 cells) displayed *pax2a*<sup>mKO2</sup>-Low  
224 fluorescence levels.

225 In summary, the analysis of *pax2a* knock-in line validates the identification of  
226 thyrocyte sub-populations within our single-cell RNA-Seq. data, and clearly  
227 demonstrates, for the first time, the presence of transcriptionally diverse sub-  
228 populations of thyrocytes present in the thyroid gland.

## 229 Discussion

230 We have applied for the first time unbiased single-cell gene expression analysis  
231 to the thyroid gland. In contrast with the mainstream view that thyrocytes constitute a  
232 molecularly uniform population, we identify two transcriptionally distinct sub-populations  
233 of thyrocytes. The two sub-populations differed, among other genes (Supp. Table 3), in  
234 the expression levels of a transcription factor *pax2a* and a cysteine protease Cathepsin  
235 B (*ctspa*) (Fig. 4B – C). Cathepsin B is particularly notable as it enables the liberation of  
236 thyroid hormone from thyrocytes by proteolytic processing of thyroglobulin (2, 20).

237 We validate the heterogeneity among the thyrocytes using a newly generated  
238 knock-in reporter line for *pax2a* gene (Fig. 5). The knock-in reporter line was generated  
239 using CRISPR/Cas9-based insertion of mKO2 fluorescent protein in the endogenous  
240 *pax2a* genomic location. The *pax2a* knock-in line faithfully recapitulates the embryonic  
241 expression of *pax2a* gene (Supp. Movie 1, Fig. 5B – F). Using the *pax2a* reporter line to  
242 characterize the adult thyroid gland, we demonstrate the presence of *pax2a*<sup>mKO2</sup>-Low  
243 thyrocytes in the follicles (Fig. 6). Notably, *pax2a*<sup>mKO2</sup>-Low and *pax2a*<sup>mKO2</sup>-High  
244 thyrocytes are present in the same follicle (Fig. 6C – D), raising the possibility of  
245 contact-mediated interactions between the two sub-populations. It would be of interest  
246 to build on this study and investigate the functional and replicative differences among  
247 the two sub-populations of thyrocytes.

248 Our single-cell transcriptomics atlas provides a comprehensive genomics  
249 resource to study the zebrafish thyroid gland in unprecedented detail. We performed  
250 unbiased profiling of the thyroid gland, without enrichment for a specific cell-type. This  
251 allowed us to capture yet poorly characterized cell-populations within the thyroid gland.

252 Specifically, we provide the molecular characteristics of the stromal tissue present in the  
253 zebrafish thyroid gland. The stromal cells display enrichment of extra-cellular matrix  
254 (ECM) related genes (Supp. Table 1) and are possibly homologous to the mesenchymal  
255 connective septa found in the mammalian thyroid gland. The connective septa helps  
256 cluster the thyroid follicles into lobules. Notably, the expression of fgf ligands from the  
257 mesenchymal septa cells has been implicated in lobe formation during mouse thyroid  
258 gland development (28). It would be of interest to test if similar morphological clustering  
259 of the thyroid follicles exists in zebrafish, and the role the stromal cells play during  
260 development and growth of the thyrocytes.

261 Our atlas further identifies a non-follicular epithelial (NFE) cell-population present  
262 in the zebrafish thyroid gland. It is interesting to note that epithelial cells apart from  
263 follicular and parafollicular cells have been observed in the mammalian thyroid gland. In  
264 a report from E. Baber published in 1876 (29), histological examination of the dog  
265 thyroid gland displayed the presence of cells “beside the stroma, lymphatics, blood  
266 vessels, & cells between the vesicles”. Dr. Baber labeled the cells as ‘parenchyma’, and  
267 noted the existence of “numerous cells differing markedly in size and shape from the  
268 epithelial cells amongst which they lie” (29). Recently, epithelial cells have been  
269 reported in a structure called the Solid Cell Nests (SCN) of the thyroid (30). SCN are  
270 lumen containing irregular structures located between the thyroid lobes in mammals.  
271 SCN contain two types of epithelial cells: main cells and C-cells, expressing TP63 and  
272 calcitonin respectively (31). Notably, the NFE cells we identified in the zebrafish thyroid  
273 gland are marked with TP63 expression (Fig. 2G), raising the possibility of their  
274 homology with the main cells of the SCN. C-cells, however, exist outside the thyroid

275 gland in zebrafish (3), and thus it is unlikely that the NFE cells we have identified would  
276 be related to cells of parafollicular origin. Currently, the developmental origin of NFE  
277 cells and their role in thyroid gland is unclear. To study the cell-population, transgenic  
278 zebrafish reagents driving expression using the *tp63* regulatory region (32) could be  
279 utilized in future.

280 To survey the communication between thyrocytes, the functional unit of the  
281 thyroid gland, and the other cell-types present in the thyroid gland, we constructed a  
282 cellular interaction network (Fig. 3B). The network was built by matching the expression  
283 of ligands in the diverse cell-types with the expression of receptor in the thyrocytes  
284 (Supp. Table 2) (19). Based on literature survey, we manually identified multiple  
285 interacting genes that have been implicated in thyroid diseases. For instance, the ligand  
286 Decorin (*dcn*) is expressed by the stromal cells and musculature, with its receptor, MET,  
287 present on thyrocytes (Fig. 3C). Decorin, a secreted proteoglycan, is considered a  
288 “guardian from the matrix” (33), as it is an antagonist of growth factor signaling.  
289 Importantly, Decorin expression has been reported to be downregulated in thyroid  
290 cancer samples (34). Thus, stromal cells could modulate Decorin to control thyrocytes  
291 growth. Further, interactions for CYR61 (associated with Graves’ Disease (35)), LRP2 /  
292 Megalin (involved in thyroglobulin processing (36)) and NRP2 (associated thyroid  
293 cancer metastasis (37)) were identified (Fig. 3C). The hypothesis generated by the  
294 theoretical ligand-receptor interaction network can be tested *in vivo* in zebrafish or *in*  
295 *vitro* by manipulation of thyrocytes in thyroid organoid models (38) to gain valuable  
296 insight into thyroid gland homeostasis.

297           The current atlas is restricted to healthy adolescent and adult thyroid gland. In  
298 future, it would be of interest to extend the atlas by including single-cell transcriptomics  
299 from embryonic and old fish, providing a comprehensive resource for development,  
300 homeostasis and aging of the thyroid gland. It would be of further interest to profile  
301 zebrafish models of thyroid disorder (39, 40) to understand the cellular and molecular  
302 changes underlying organ dysfunction. Combined with the power of CRISPR/Cas9  
303 based screen that we have established for the thyroid gland (27), this resource will  
304 provide a roadmap for the functional elucidation of cell type specific programs during  
305 thyroid gland growth and homeostasis.

306           In summary, our work provides the first molecular map of the zebrafish thyroid  
307 gland at cellular resolution. The atlas contains the molecular characterization of the  
308 thyroid gland stromal population, identification of non-follicular epithelial cells, and  
309 demonstrate the transcriptional heterogeneity among zebrafish thyrocytes. Further, by  
310 constructing cell-cell communication network, the atlas provides clues into tissue  
311 dynamics present within the organ. Finally, the dataset has been made available for  
312 browsing via an interactive webtool (<https://sumeet.shinyapps.io/zfthyroid/>). We hope  
313 that our efforts will expand the understanding of thyrocytes beyond a nominally  
314 homogenous endocrine cell population; providing a complex picture of the diversity in  
315 thyrocyte identity and function.

316

## 317 **Methods**

### 318 **Zebrafish strains and husbandry**

319 Wild-type or transgenic zebrafish of the outbred AB, WIK, or a hybrid WIK/AB strain  
320 were used in all experiments. Zebrafish were raised under standard conditions at 28 °C.  
321 Animals were chosen at random for all experiments. Published transgenic strains used  
322 in this study were *Tg(tg:nls-mVenus-T2A-NTR)* (7) and *Tg(tg:nls-GFP)* (27).  
323 Experiments with *Tg(tg:nls-mVenus-T2A-NTR)* were conducted in accordance with the  
324 Animal Welfare Act and with permission of the Landesdirektion Sachsen, Germany  
325 (DD24-5131/346/11, DD24-5131/346/12, DD24.1-5131/476/2, TVV21/2018 and all  
326 corresponding amendments). Zebrafish husbandry and experiments with *Tg(tg:nls-*  
327 *GFP)* and *pax2a* knock-in line were performed under standard conditions in accordance  
328 with institutional (Université Libre de Bruxelles (ULB)) and national ethical and animal  
329 welfare guidelines and regulation, which were approved by the ethical committee for  
330 animal welfare (CEBEA) from the Université Libre de Bruxelles (protocols 578N-579N).

### 331 **Single cell suspension of zebrafish thyroid gland**

332 Single cell suspension of zebrafish thyroid gland was performed by adapting the cell  
333 dissociation protocol outlined in Singh et al., Scientific Reports, 2018 (41). In brief, the  
334 thyroid gland was collected and dissociated into single cells by incubation in TrypLE  
335 (ThermoFisher, 12563029) with 0.1% Pluronic F-68 (ThermoFisher, 24040032) at 37 °C  
336 in a benchtop shaker set at 450 rpm for 45 min. Following dissociation, TrypLE was  
337 inactivated with 10% FBS, and the cells pelleted by centrifugation at 500g for 10min at 4  
338 °C. The supernatant was carefully discarded and the pellet re-suspended in 500 uL of



339 HBSS (without Ca, Mg) + 0.1% Pluronic F-68. To remove debris, the solution was  
340 passed over a 30  $\mu$ m cell filter (Miltenyi Biotec, 130-041-407). To remove dead cells,  
341 calcein violet (ThermoFisher, C34858) was added at a final concentration of 1  $\mu$ M and  
342 the cell suspension incubated at room temperature for 20 minutes. The single cell  
343 preparation was sorted with the appropriate gates, including excitation with UV (405 nm)  
344 laser for identification of alive cells (calcein+). FACS was performed through 100  $\mu$ m  
345 nozzle.

### 346 **Single-cell profiling of the zebrafish thyroid gland**

347 For single-cell RNA-seq of the zebrafish thyroid gland using the 10X Genomics  
348 platform, cell suspension was prepared as mentioned above from the thyroid glands of  
349 six 2 month post fertilization and six 8 month post-fertilization *Tg(tg:nls-mVenus-T2A-*  
350 *NTR)* animals. The cell suspension was adjusted with Hanks' Balanced Salt Solution  
351 (without calcium and magnesium) to a density of 800cells/ $\mu$ l, and diluted with nuclease-  
352 free water according to the manufacturer's instructions to yield 12,000 cells.

353 Subsequently, the cells were carefully mixed with reverse transcription mix before  
354 loading the cells on the 10X Genomics Chromium system (10). After the gel emulsion  
355 bead suspension underwent the reverse transcription reaction, emulsion was broken  
356 and DNA purified using Silane beads. The complementary DNA was amplified with 10  
357 cycles, following the guidelines of the 10x Genomics user manual. The 10X Genomics  
358 single cell RNA-seq library preparation—involving fragmentation, dA tailing, adapter  
359 ligation and indexing PCR—was performed based on the manufacturer's protocol. After  
360 quantification, the libraries were sequenced on an Illumina NextSeq 550 machine using  
361 a HighOutput flowcell in paired-end mode (R1: 26 cycles; I1: 8 cycles; R2: 57 cycles),

362 thus generating ~45mio fragments. The raw sequencing data were then processed with  
363 the 'count' command of the Cell Ranger software (v.2.1.0) provided by 10x Genomics  
364 with the option '--expect-cells' set to 10,000 (all other options were used as per default).  
365 To build the reference for Cell Ranger, zebrafish genome (GRCz10) as well as gene  
366 annotation (Ensembl 87) were downloaded from Ensembl and the annotation was  
367 filtered with the 'mkgtf' command of Cell Ranger (options: '--  
368 attribute=gene\_biotype:protein\_coding-- attribute=gene\_biotype:lincRNA --  
369 attribute=gene\_biotype:antisense'). Genome sequence and filtered annotation were  
370 then used as input to the 'mkref' command of Cell Ranger to build the appropriate Cell  
371 Ranger Reference.

## 372 **Analysis of single-cell RNA-Seq. of the zebrafish thyroid gland**

373 The raw data generated from 10x Chromium pipeline was clustered using Seurat 2.3.4  
374 (42) using the recommended analysis pipeline. Briefly, the raw data as UMI-counts was  
375 log-normalized, regressed to remove the effect of library size and mitochondrial counts,  
376 and scaled. Highly variable genes were identified for PCA analysis and graph-based  
377 clustering. Marker genes identified for each cluster were used to classify the cell-type.  
378 The thyrocyte cluster was isolated and sub-clustered to identify and label sub-  
379 populations.

## 380 **Data Availability**

381 The raw 10X data, along with tabulated count data are available publicly from GEO  
382 under accession number GSE133466. The atlas for online browsing is available at  
383 <https://sumeet.shinyapps.io/zfthyroid/>.

### 384 **Generation of knock-in *pax2a*<sup>*pax2a-T2A-mKO2*</sup> zebrafish line**

385 For generation of *pax2a* reporter line, we designed a single-guide RNA (sgRNA) targeting  
386 the STOP codon of the *pax2a* coding sequence (GCTGCGATGGTAACTAGTGG). We  
387 then generated a donor construct in which the sequence encoding for the monomeric  
388 Kusabira orange (mKO2) protein was fused to a viral 2A peptide linker. This reporter  
389 cassette was flanked by left (1000bp) and right (2000bp) homology arms of the *pax2a*  
390 genomic DNA region around the stop codon therefore preventing the sgRNA from cutting  
391 the donor construct. sgRNA design, production and validation were done as previously  
392 described (27, 43). Wild-type embryos were injected with 3 nL of the injection mix  
393 containing the sgRNA (final concentration 80 ng/μL), the donor construct (final  
394 concentration 7.5 ng/μL), the protein Cas9 (recombinant cas protein from *S. pyogenes*  
395 PNA Bio CP01, final concentration 100 ng/μL) and KCL (final concentration 200 mM).  
396 Upon homologous recombination of this reporter construct in the endogenous locus,  
397 *pax2a*-expressing cells were fluorescently labelled by mKO2. This *pax2a*<sup>*pax2a-T2A-mKO2*</sup> line  
398 is referenced as *pax2a*<sup>mKO2</sup> in the text.

### 399 **Generation of *pax2a* crispants**

400 Somatic mutagenesis of *pax2a* gene was carried out exactly as mentioned in Trubiroha  
401 et al., Scientific Reports, 2018 (27). Briefly, sgRNA targeting the exon 2 of *pax2a* was  
402 generated as described in the publication. Following the strategy described in the  
403 publication, Cas9 protein along with sgRNA was injected in one-cell stage of zebrafish  
404 embryos for disruption of *pax2a* gene. Non-injected animals were used as controls.

## 405 **Tissue collection**

406 To facilitate confocal imaging of the thyroid gland, the organ was dissected from fish  
407 after fixation. Fish were killed in Tricaine prior to either direct fixation or dissection of the  
408 gland, and the samples immersed in 4% paraformaldehyde + 1% Triton-X overnight at 4  
409 °C. The gland was then manually dissected and washed multiple times in PBS.

## 410 **Immunofluorescence and image acquisition**

411 Whole-mount immunofluorescence was performed on thyroid gland collected as  
412 described above. The collected samples were permeabilized in 1% PBT (Triton-X-100)  
413 and blocked in 4% PBTB (BSA). Primary and secondary antibody stainings were  
414 performed overnight at 4 °C. Primary antibodies used in this study were anti-PAX2A  
415 (rabbit, Genetex GTX128127) at 1:250, anti-EGFP (chicken, Abcam ab13970) at 1:1000,  
416 anti-E-Cadherin (mouse, BD bioscience cat 610181) at 1:200, anti-monomeric Kusabira-  
417 Orange 2 (mouse, MBL amalgam M-168-3M) at 1:200 and anti-monomeric Kusabira-  
418 Orange 2 (rabbit, MBL amalgam PM051M) at 1:250. Secondary antibodies at 1:250  
419 dilutions used in this study were Alexa Fluor 488 anti-chicken (Jackson ImmunoResearch  
420 laboratories 703-545-155), Alexa Fluor 647 anti-rabbit (Jackson ImmunoResearch  
421 laboratories 711-605-152), Alexa Fluor 647 anti-mouse (Jackson ImmunoResearch  
422 laboratories 715-605-150), Cy<sup>TM</sup>3-conjugated anti-rabbit (Jackson ImmunoResearch  
423 laboratories 711-165-152) and Cy<sup>TM</sup>3-conjugated anti-mouse (Jackson ImmunoResearch  
424 laboratories 715-165-150). When needed nuclei were staining using DAPI at a 1:1000  
425 dilution. Samples were mounted in NuSieve<sup>TM</sup> GTG<sup>TM</sup> Agarose (Lonza cat50080) and  
426 imaged on a glass bottom FluoroDish<sup>TM</sup> (WPI FD3510-100) using a Zeiss LSM 780

427 confocal microscope or Leica DMI 6000b microscope. ImageJ was used to add scale bars  
428 and PowerPoint was used for adding arrows and labels.

#### 429 **FACS-based reporter analysis**

430 For analysing the levels of *pax2a*<sup>mKO2</sup> by FACS, single-cell suspension from the thyroid  
431 gland of 5 mpf *Tg(tg:nls-GFP); pax2a*<sup>mKO2</sup> animals was prepared as described earlier  
432 and stained with 1 µM calcein violet (ThermoFisher, C34858). Cells were sorted and  
433 analyzed using FACS-Aria II (BD Bioscience). Thyrocytes were selected by gating for  
434 calcein+ GFP+ population, and mKO2 expression level recorded for analysis.

#### 435 **Gene Ontology (GO) Analysis**

436 Gene ontology (GO) analysis was performed using DAVID (44). The list of genes was  
437 uploaded on the web browser of DAVID and statistically significant (p-value < 0.05) GO  
438 terms were identified using default parameters.

#### 439 **Statistical analysis**

440 Statistical analysis was performed using R. No animals were excluded from analysis.  
441 Blinding was not performed during analysis. Analysis of normal distribution was not  
442 performed.

443

## 444 References

- 445 1. Taylor PN, Albrecht D, Scholz A, Gutierrez-Buey G, Lazarus JH, Dayan CM,  
446 Okosieme OE 2018 Global epidemiology of hyperthyroidism and hypothyroidism.  
447 Nat Rev Endocrinol **14**:301–316.
- 448 2. Brix K, Lemansky P, Herzog V 1996 Evidence for extracellularly acting cathepsins  
449 mediating thyroid hormone liberation in thyroid epithelial cells. Endocrinology  
450 **137**:1963–74.
- 451 3. Alt B, Reibe S, Feitosa NM, Elsalini OA, Wendl T, Rohr KB 2006 Analysis of origin  
452 and growth of the thyroid gland in zebrafish. Dev Dyn **235**:1872–1883.
- 453 4. Linehan SA, Martínez-Pomares L, da Silva RP, Gordon S 2001 Endogenous  
454 ligands of carbohydrate recognition domains of the mannose receptor in murine  
455 macrophages, endothelial cells and secretory cells; potential relevance to  
456 inflammation and immunity. Eur J Immunol **31**:1857–66.
- 457 5. Nonidez JF 1931 Innervation of the thyroid gland. II. Origin and course of the  
458 thyroid nerves in the dog. Am J Anat **48**:299–329.
- 459 6. Svensson V, Vento-Tormo R, Teichmann SA 2018 Exponential scaling of single-  
460 cell RNA-seq in the past decade. Nat Protoc **13**:599–604.
- 461 7. McMenamin SK, Bain EJ, McCann AE, Patterson LB, Eom DS, Waller ZP, Hamill  
462 JC, Kuhlman JA, Eisen JS, Parichy DM 2014 Thyroid hormone-dependent adult  
463 pigment cell lineage and pattern in zebrafish. Science (80- ) **345**:1358–1361.
- 464 8. AlJanahi AA, Danielsen M, Dunbar CE 2018 An Introduction to the Analysis of  
465 Single-Cell RNA-Sequencing Data. Mol Ther Methods Clin Dev **10**:189–196.
- 466 9. Macosko EZ, Basu A, Satija R, Nemesh J, Shekhar K, Goldman M, Tirosh I,

- 467 Bialas AR, Kamitaki N, Martersteck EM, Trombetta JJ, Weitz DA, Sanes JR,  
468 Shalek AK, Regev A, McCarroll SA 2015 Highly Parallel Genome-wide  
469 Expression Profiling of Individual Cells Using Nanoliter Droplets. *Cell* **161**:1202–  
470 1214.
- 471 10. Zheng GXY, Terry JM, Belgrader P, Ryvkin P, Bent ZW, Wilson R, Ziraldo SB,  
472 Wheeler TD, McDermott GP, Zhu J, Gregory MT, Shuga J, Montesclaros L,  
473 Underwood JG, Masquelier DA, Nishimura SY, Schnall-Levin M, Wyatt PW,  
474 Hindson CM, Bharadwaj R, Wong A, Ness KD, Beppu LW, Deeg HJ, McFarland  
475 C, Loeb KR, Valente WJ, Ericson NG, Stevens EA, Radich JP, Mikkelsen TS,  
476 Hindson BJ, Bialas JH 2017 Massively parallel digital transcriptional profiling of  
477 single cells. *Nat Commun* **8**:14049.
- 478 11. Kivioja T, Vähärautio A, Karlsson K, Bonke M, Enge M, Linnarsson S, Taipale J  
479 2011 Counting absolute numbers of molecules using unique molecular identifiers.  
480 *Nat Methods* **9**:72–4.
- 481 12. Islam S, Zeisel A, Joost S, La Manno G, Zajac P, Kasper M, Lönnerberg P,  
482 Linnarsson S 2014 Quantitative single-cell RNA-seq with unique molecular  
483 identifiers. *Nat Methods* **11**:163–6.
- 484 13. Maaten L van der, Hinton G 2008 Visualizing data using t-SNE. *J Mach Learn*  
485 *Res* **9**:2579–2605.
- 486 14. Sánchez-Iranzo H, Galardi-Castilla M, Sanz-Morejón A, González-Rosa JM,  
487 Costa R, Ernst A, Sainz de Aja J, Langa X, Mercader N 2018 Transient fibrosis  
488 resolves via fibroblast inactivation in the regenerating zebrafish heart. *Proc Natl*  
489 *Acad Sci U S A* **115**:4188–4193.

- 490 15. Denton CP, Zheng B, Shiwen X, Zhang Z, Bou-Gharios G, Eberspaecher H, Black  
491 CM, de Crombrughe B 2001 Activation of a fibroblast-specific enhancer of the  
492 proalpha2(I) collagen gene in tight-skin mice. *Arthritis Rheum* **44**:712–22.
- 493 16. Lisse TS, Middleton LJ, Pellegrini AD, Martin PB, Spaulding EL, Lopes O, Brochu  
494 EA, Carter E V, Waldron A, Rieger S 2016 Paclitaxel-induced epithelial damage  
495 and ectopic MMP-13 expression promotes neurotoxicity in zebrafish. *Proc Natl*  
496 *Acad Sci U S A* **113**:E2189-98.
- 497 17. Reischauer S, Levesque MP, Nüsslein-Volhard C, Sonawane M 2009 Lgl2  
498 executes its function as a tumor suppressor by regulating ErbB signaling in the  
499 zebrafish epidermis. *PLoS Genet* **5**:e1000720.
- 500 18. Barbieri CE, Pietenpol JA 2006 p63 and epithelial biology. *Exp Cell Res* **312**:695–  
501 706.
- 502 19. Ramilowski JA, Goldberg T, Harshbarger J, Kloppman E, Lizio M, Satagopam VP,  
503 Itoh M, Kawaji H, Carninci P, Rost B, Forrest ARR 2015 A draft network of ligand-  
504 receptor-mediated multicellular signalling in human. *Nat Commun* **6**:7866.
- 505 20. Brix K, Linke M, Tepel C, Herzog V 2001 Cysteine proteinases mediate  
506 extracellular prohormone processing in the thyroid. *Biol Chem* **382**:717–25.
- 507 21. Linke M 2002 Trafficking of lysosomal cathepsin B--green fluorescent protein to  
508 the surface of thyroid epithelial cells involves the endosomal/lysosomal  
509 compartment. *J Cell Sci* **115**:4877–4889.
- 510 22. Wendl T, Lun K, Mione M, Favor J, Brand M, Wilson SW, Rohr KB 2002 Pax2.1 is  
511 required for the development of thyroid follicles in zebrafish. *Development*  
512 **129**:3751–60.



- 513 23. Porazzi P, Calebiro D, Benato F, Tiso N, Persani L 2009 Thyroid gland  
514 development and function in the zebrafish model. *Mol Cell Endocrinol* **312**:14–23.
- 515 24. Pfeffer PL, Gerster T, Lun K, Brand M, Busslinger M 1998 Characterization of  
516 three novel members of the zebrafish Pax2/5/8 family: dependency of Pax5 and  
517 Pax8 expression on the Pax2.1 (noi) function. *Development* **125**:3063–74.
- 518 25. Mansouri A, Chowdhury K, Gruss P 1998 Follicular cells of the thyroid gland  
519 require Pax8 gene function. *Nat Genet* **19**:87–90.
- 520 26. Kesavan G, Chekuru A, Machate A, Brand M 2017 CRISPR/Cas9-Mediated  
521 Zebrafish Knock-in as a Novel Strategy to Study Midbrain-Hindbrain Boundary  
522 Development. *Front Neuroanat* **11**:52.
- 523 27. Trubiroha A, Gillotay P, Giusti N, Gacquer D, Libert F, Lefort A, Haerlingen B, De  
524 Deken X, Opitz R, Costagliola S 2018 A Rapid CRISPR/Cas-based Mutagenesis  
525 Assay in Zebrafish for Identification of Genes Involved in Thyroid Morphogenesis  
526 and Function. *Sci Rep* **8**:5647.
- 527 28. Liang S, Johansson E, Barila G, Altschuler DL, Fagman H, Nilsson M 2018 A  
528 branching morphogenesis program governs embryonic growth of the thyroid  
529 gland. *Development* **145**:dev146829.
- 530 29. Baber EC 1876 XXI. Contributions to the minute anatomy of the thyroid gland of  
531 the dog. *Philos Trans R Soc London* **166**:557–568.
- 532 30. Harach HR 1988 Solid cell nests of the thyroid. *J Pathol* **155**:191–200.
- 533 31. Ríos Moreno MJ, Galera-Ruiz H, De Miguel M, López MIC, Illanes M, Galera-  
534 Davidson H 2011 Immunohistochemical profile of solid cell nest of thyroid gland.  
535 *Endocr Pathol* **22**:35–9.

- 536 32. Rasmussen JP, Sack GS, Martin SM, Sagasti A 2015 Vertebrate epidermal cells  
537 are broad-specificity phagocytes that clear sensory axon debris. *J Neurosci*  
538 **35**:559–70.
- 539 33. Neill T, Schaefer L, Iozzo R V 2012 Decorin: a guardian from the matrix. *Am J*  
540 *Pathol* **181**:380–7.
- 541 34. Martínez-Aguilar J, Clifton-Bligh R, Molloy MP 2016 Proteomics of thyroid  
542 tumours provides new insights into their molecular composition and changes  
543 associated with malignancy. *Sci Rep* **6**:23660.
- 544 35. Planck T, Shahida B, Sjögren M, Groop L, Hallengren B, Lantz M 2014  
545 Association of BTG2, CYR61, ZFP36, and SCD gene polymorphisms with  
546 Graves' disease and ophthalmopathy. *Thyroid* **24**:1156–61.
- 547 36. Marinò M, McCluskey RT 2000 Megalin-mediated transcytosis of thyroglobulin by  
548 thyroid cells is a calmodulin-dependent process. *Thyroid* **10**:461–9.
- 549 37. Tu D-G, Chang W-W, Jan M-S, Tu C-W, Lu Y-C, Tai C-K 2016 Promotion of  
550 metastasis of thyroid cancer cells via NRP-2-mediated induction. *Oncol Lett*  
551 **12**:4224–4230.
- 552 38. Antonica F, Kasprzyk DF, Opitz R, Iacovino M, Liao X-H, Dumitrescu AM, Refetoff  
553 S, Peremans K, Manto M, Kyba M, Costagliola S 2012 Generation of functional  
554 thyroid from embryonic stem cells. *Nature* **491**:66–71.
- 555 39. Chopra K, Ishibashi S, Amaya E 2019 Zebrafish duox mutations provide a model  
556 for human congenital hypothyroidism. *Biol Open* **8**.
- 557 40. Anelli V, Villefranc JA, Chhangawala S, Martinez-McFaline R, Riva E, Nguyen A,  
558 Verma A, Bareja R, Chen Z, Scognamiglio T, Elemento O, Houvras Y 2017

- 559 Oncogenic BRAF disrupts thyroid morphogenesis and function via twist  
560 expression. *Elife* **6**.
- 561 41. Singh SP, Janjuha S, Chaudhuri S, Reinhardt S, Kränkel A, Dietz S, Eugster A,  
562 Bilgin H, Korkmaz S, Zararsız G, Ninov N, Reid JE 2018 Machine learning based  
563 classification of cells into chronological stages using single-cell transcriptomics.  
564 *Sci Rep* **8**:17156.
- 565 42. Butler A, Hoffman P, Smibert P, Papalexi E, Satija R 2018 Integrating single-cell  
566 transcriptomic data across different conditions, technologies, and species. *Nat*  
567 *Biotechnol* doi: 10.1101/164889.
- 568 43. Varshney GK, Pei W, LaFave MC, Idol J, Xu L, Gallardo V, Carrington B, Bishop  
569 K, Jones M, Li M, Harper U, Huang SC, Prakash A, Chen W, Sood R, Ledin J,  
570 Burgess SM 2015 High-throughput gene targeting and phenotyping in zebrafish  
571 using CRISPR/Cas9. *Genome Res* **25**:1030–42.
- 572 44. Huang D, Sherman BT, Tan Q, Collins JR, Alvord WG, Roayaei J, Stephens R,  
573 Baseler MW, Lane HC, Lempicki RA 2007 The DAVID Gene Functional  
574 Classification Tool: a novel biological module-centric algorithm to functionally  
575 analyze large gene lists. *Genome Biol* **8**:R183.
- 576
- 577

## 578 **Acknowledgements**

579 We thank members of the Costagliola and Singh lab for comments on the manuscript,  
580 members of Center for Regenerative Therapies Dresden (CRTD) fish, FACS and  
581 sequencing facility, and members of IRIBHM fish facility for technical assistance. We  
582 thank J.-M. Vanderwinden from the Light Microscopy Facility and Christine Dubois from  
583 the FACS facility for technical assistance at ULB. We are grateful to Priyanka Oberoi for  
584 illustrations. P.G is Fund for Research in the Industry and the Agriculture (FRIA)  
585 Research fellow; M.S. is FNRS Research Fellow (34985615 - THYSCEFA); S.C. is  
586 FNRS Senior Research Associate. V.D. acknowledges grants from the Fond Naets  
587 (J1813300), the Fondation Contre le Cancer (2016-093) and FNRS (EQP/OL  
588 U.N019.19, J006120F). Work by M.B., C.L. and G.K. was supported by grants to M.B.  
589 from the Deutsche Forschungsgemeinschaft and European Union (European Research  
590 Council AdG Zf-BrainReg). Work by S.P.S. was supported by MISU funding from the  
591 FNRS (34772792 – SCHISM). This work was supported by grants from the Belgian  
592 National Fund for Scientific Research (FNRS) (FRSM 3-4598-12; CDR-J.0145.16, GEQ  
593 U.G030.19), the Fonds d'Encouragement à la Recherche de l'Université Libre de  
594 Bruxelles (FER-ULB).

## 595 **Author contribution**

596 S.P.S. conceptualized the project. G.K., C.L. and M.B. provided animals for single-cell  
597 RNA-Sequencing. S.P.S., S.R., A.K., J.B., and A.P. performed the single-cell RNA-  
598 Sequencing. S.P.S., S.E.E., V.D., S.C. analysed and interpreted the data. S.P.S.  
599 developed the online browser. P.G. generated the *pax2a* knock-in line. P.G. and M.S.

600 analysed the *pax2a* reporter line. S.P.S. wrote the first draft and P.G. edited the  
601 manuscript. S.P.S. acquired funding for the project. All authors read and approved the  
602 final manuscript.

603 **Conflict of interest**

604 The authors declare no competing interests.

## 605 **Figure Legends**

### 606 **Figure 1: Single-cell RNA-Seq. of the zebrafish thyroid gland**

607 **(A – B)** A brightfield image showing the zebrafish thyroid gland along with surrounding  
608 tissue. The thyroid gland surrounds the ventral aorta, which extends from the outflow  
609 tract of the heart into the gills towards the lower jaw. The thyroid follicular cells, or  
610 thyrocytes, are labeled in green in the *Tg(tg:nls-mVenus-NTR)* transgenic line (B'). **(C)**  
611 A t-SNE plot displaying the 6249 single-cells profiled in the zebrafish thyroid gland atlas.  
612 The colors represent cell clusters denoting a specific cell-type. **(D – F)** Cluster #1  
613 represents the thyrocytes that express *tg*, *slc5a5* (NIS) and *tpo*.

### 614 **Figure 2: Gene expression signature of the different cell-types in the zebrafish** 615 **thyroid gland**

616 **(A)** Heatmap depicting five genes specifically expressed in each one of the seven  
617 clusters of the zebrafish thyroid gland atlas. **(B – G)** t-SNE plots overlaid with the  
618 expression of a gene specific to each of the cluster. The endothelium cluster (cluster #2)  
619 is a mix of blood vessels and lymphatic vessels (see Supp. Fig. 4), while the immune  
620 cell cluster (cluster #4) is a mix of macrophages, neutrophils and lymphocytes (see  
621 Supp. Fig. 5).

### 622 **Figure 3: Connectome of the zebrafish thyroid gland identifies a dense** 623 **intercellular signaling network**

624 **(A)** To build a connectome for the atlas, the ligands expressed specifically in each cell-  
625 type were matched with their corresponding receptors in the thyrocytes. **(B)** A highly

626 connected intercellular interaction network is identified by the connectome. The number  
627 of ligand-receptor pairs identified between two cell-types is denoted alongside the  
628 arrows. **(C)** A dotplot depicting examples of paracrine and autocrine signaling in the  
629 thyroid gland. The dots represent expression level in the different cell-types of the atlas.

630 **Figure 4: Thyrocytes can be subdivided into two transcriptionally distinct sub-**  
631 **populations**

632 **(A)** Unsupervised clustering of the thyrocyte population identifies two sub-populations.  
633 **(B)** Heatmap depicting the top ten most differentially expressed genes between the two  
634 sub-populations. **(C)** Violin plots depicting the expression levels of three specific genes  
635 in each sub-populations. Y-axis represents scaled data.

636 **Figure 5: *pax2a*<sup>mKO2</sup> knock-in line faithfully reports *pax2a* expression and knock-**  
637 **down**

638 **(A)** Schematic of the knock-in strategy used to generate the *pax2a*<sup>mKO2</sup> line. Double  
639 strand break was induced between the penultimate codon and the STOP codon of *pax2a*  
640 gene using CRISPR/Cas9. DNA repair integrates the donor construct at the site of double  
641 strand break, resulting in a *pax2a* reporter line. The donor construct contains T2A-mKO2  
642 reporter cassette flanked by left homology (LH) and right homology (RH) arms. **(B)** Whole  
643 mount immunofluorescence of 9.5hpf *pax2a*<sup>mKO2</sup> embryos stained with anti-mKO2  
644 antibody (red) and anti-PAX2A antibody (green). Anterior is to the left, and dorsal side is  
645 to the top. **(C)** Whole mount immunofluorescence of 55 hpf *pax2a*<sup>mKO2</sup>; *Tg(tg:nls-EGFP)*  
646 stained with PAX2A antibody (PAX2A-Ab) displays an overlap of mKO2 and PAX2A-Ab  
647 signal. The otic vesicle (OV), mid-hindbrain barrier (MHB), interneurons (IN) and thyroid

648 gland (THY) is labelled. **(D – F)** Confocal microscopy imaging of a sagittal section of a 55  
649 hpf *pax2a<sup>mKO2</sup>; Tg(tg:nls-EGFP)* embryos showing co-localization of mKO2 and *pax2a* in  
650 the pronephros (D), thyroid gland (E) and mid-hindbrain barrier (F). In the thyroid gland,  
651 mKO2, PAX2A-Ab and thyrocyte-specific GFP (green) show co-localization. Scale bars:  
652 100µm (C) and 50µm (D – F). Anterior to the right, white dashed line represents the  
653 outline of the embryo. **(G – H)** Snapshots from live imaging of 55 hpf *pax2a<sup>mKO2</sup>; Tg(tg:nls-*  
654 *EGFP)* embryos injected with sgRNA targeting *pax2a* coding sequence. The anterior part  
655 of a representative control embryo (G) is shown alongside a representative crispant (H).  
656 Crispants display a strong reduction of mKO2 fluorescence, as well as an absence of  
657 GFP signal suggesting absence of thyroid (THY) tissue.

658 **Figure 6: A *pax2a* knock-in line validates the presence of thyrocyte sub-**  
659 **populations**

660 **(A-D)** Analysis of 3 mpf thyroid gland from *pax2a<sup>mKO2</sup>* zebrafish shows heterogeneity in  
661 *pax2a* reporter expression. **(A)** Whole mount confocal imaging of a 3 mpf *pax2a<sup>mKO2</sup>*  
662 thyroid labelled with mKO2 (red), E-cadherin (cyan, not shown in 'A' for clarity reasons)  
663 and DAPI (dark blue) for nuclear localisation. **(B – D)** Optical sections of three follicles,  
664 with mKO2-Low cells labelled with arrows. E-cadherin (B' – D') and DAPI (B'' – D'')  
665 staining shows that absence of mKO2 signal does not correspond to an absence of cells.  
666 Scale bars: 250 µm (A), 50 µm (B – D). Anterior to the bottom of the pictures. **(E – G)**  
667 Cells from the thyroid gland of 5 mpf *Tg(tg:nls-GFP); pax2a<sup>mKO2</sup>* animals were labelled  
668 with calcein (live cell marker) and analysed using FACS. (E) A FACS plot showing calcein  
669 on X-axis and GFP on Y-axis. The box encompassing the GFP+ cells represents the  
670 thyrocyte population, which was gated for further analysis. (F) Histogram showing the



671 distribution of GFP intensity in thyrocytes. (G) Histogram showing the distribution of  
672 mKO2 intensity in thyrocytes. Thyrocytes were selected by gating for GFP+ population.  
673 Horizontal lines indicate the mKO2-Low and mKO2-High expression level, with  
674 percentage values representing proportion of thyrocytes with mKO2-Low and mKO2-High  
675 expression.

## Figure 1

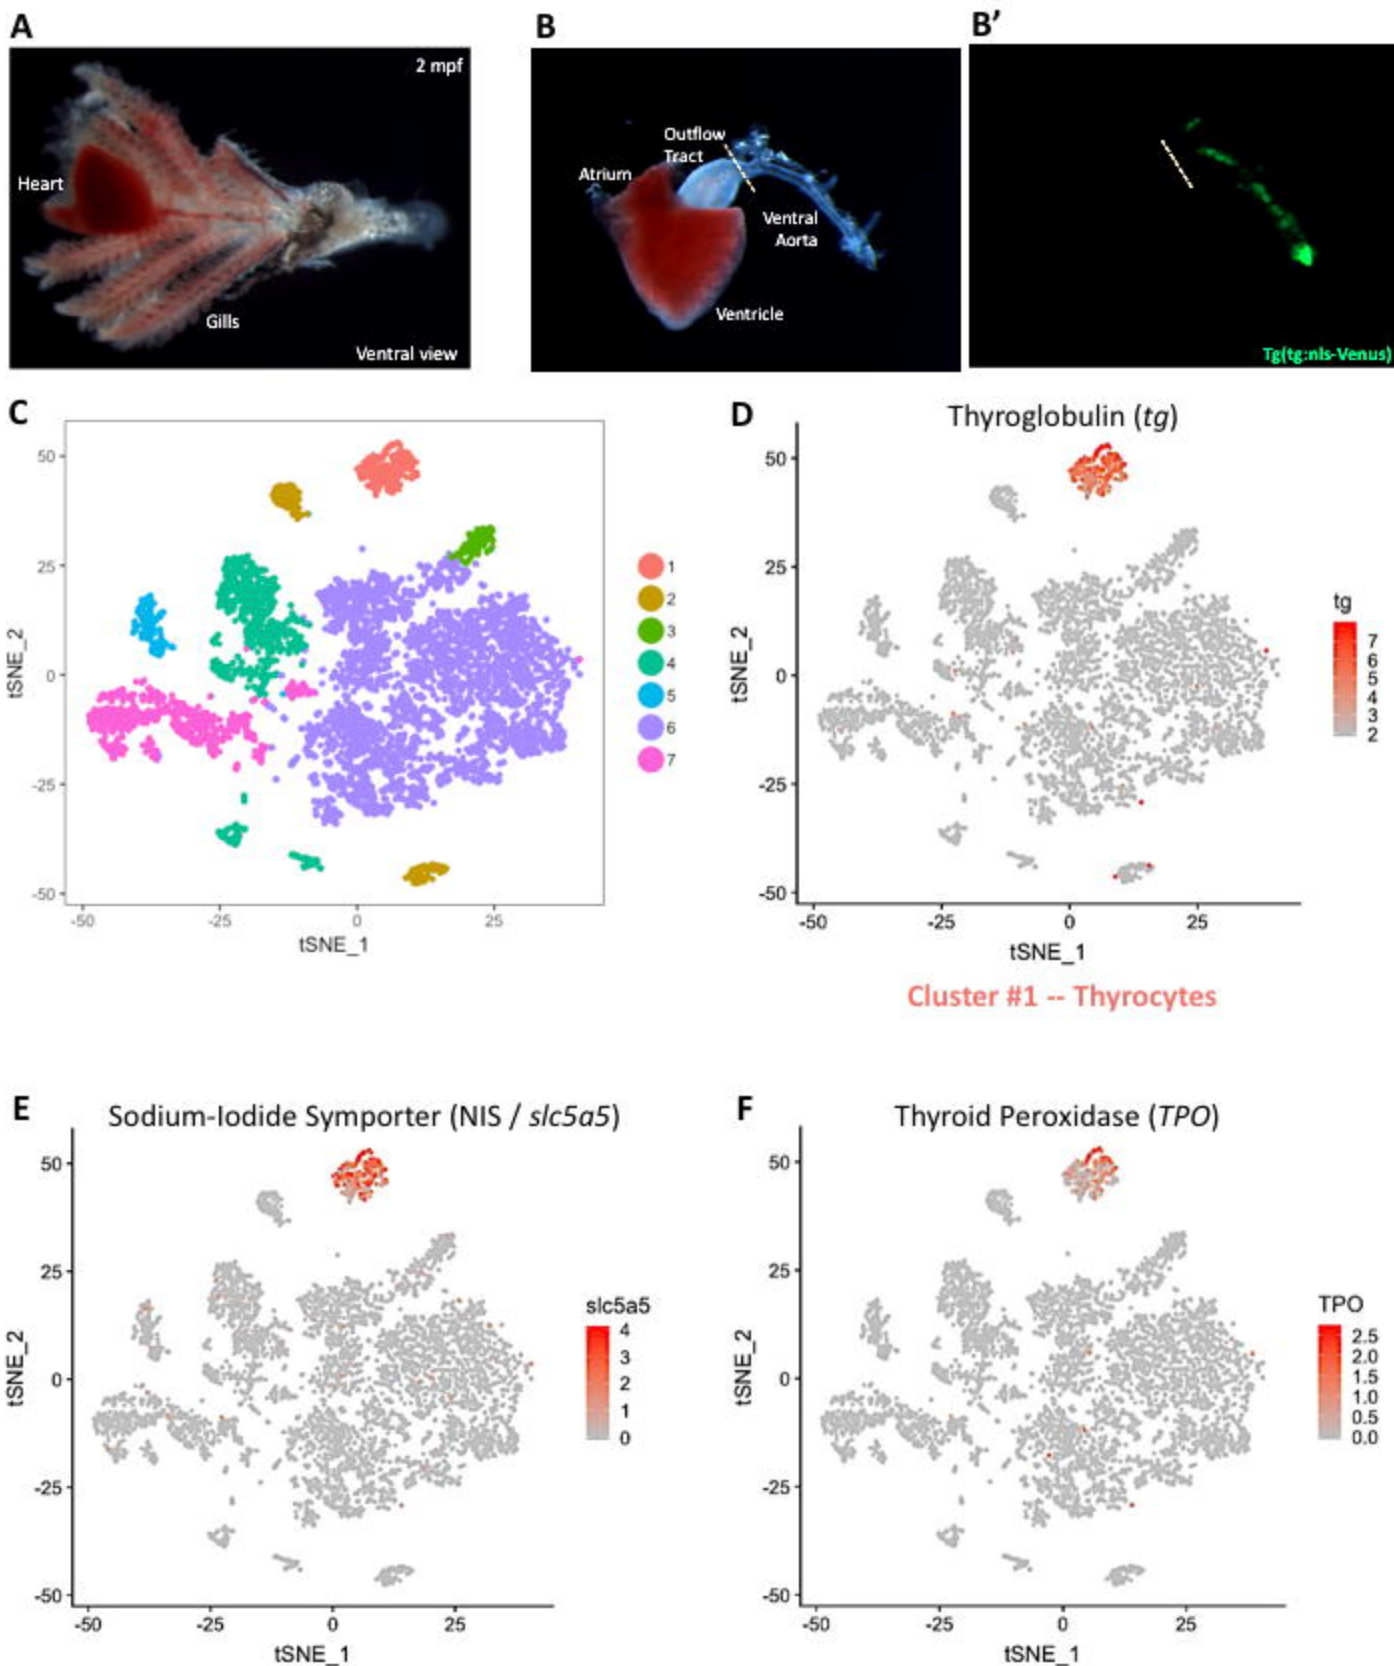

## Figure 2

A

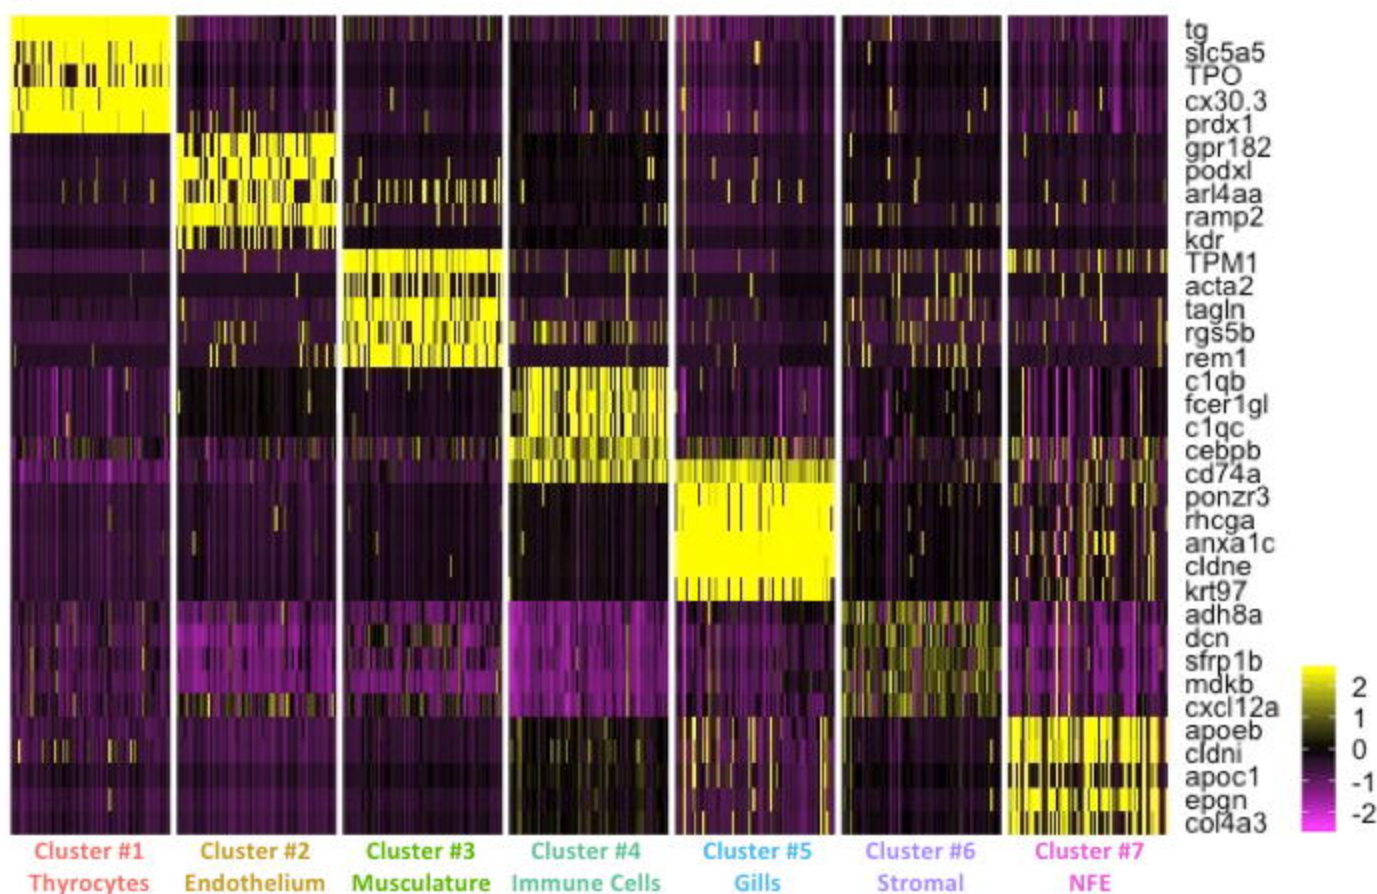

B Adrenomedullin Receptor (*gpr182*)

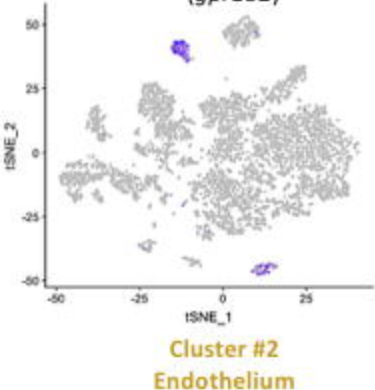

C Actin Alpha 2, Smooth Muscle (*acta2*)

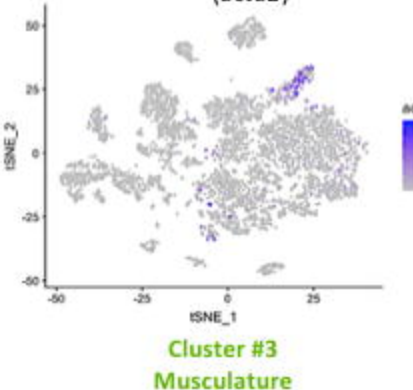

D Fc Fragment Of IgE Receptor Ig (*fcer1gl*)

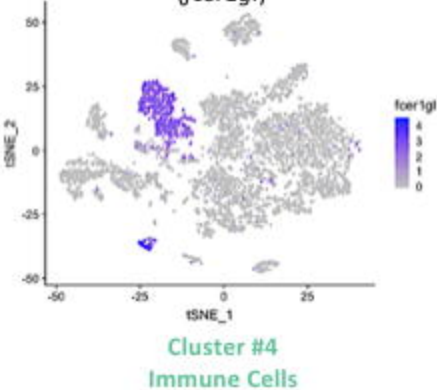

E Plac8 onzin related protein 3 (*ponzr3*)

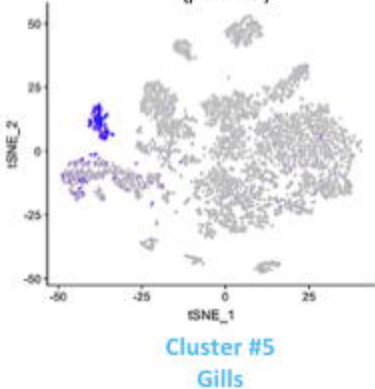

F Collagen1A2 (*col1a2*)

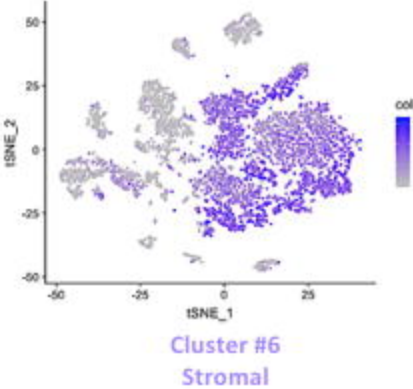

G Tumor Protein P63 (*tp63*)

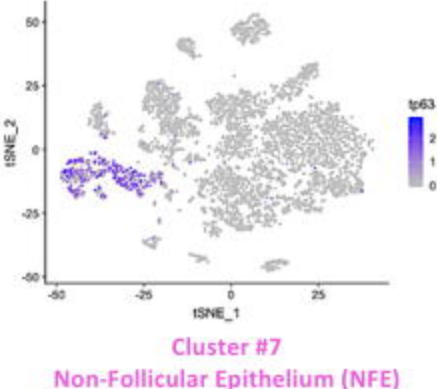





## Figure 4

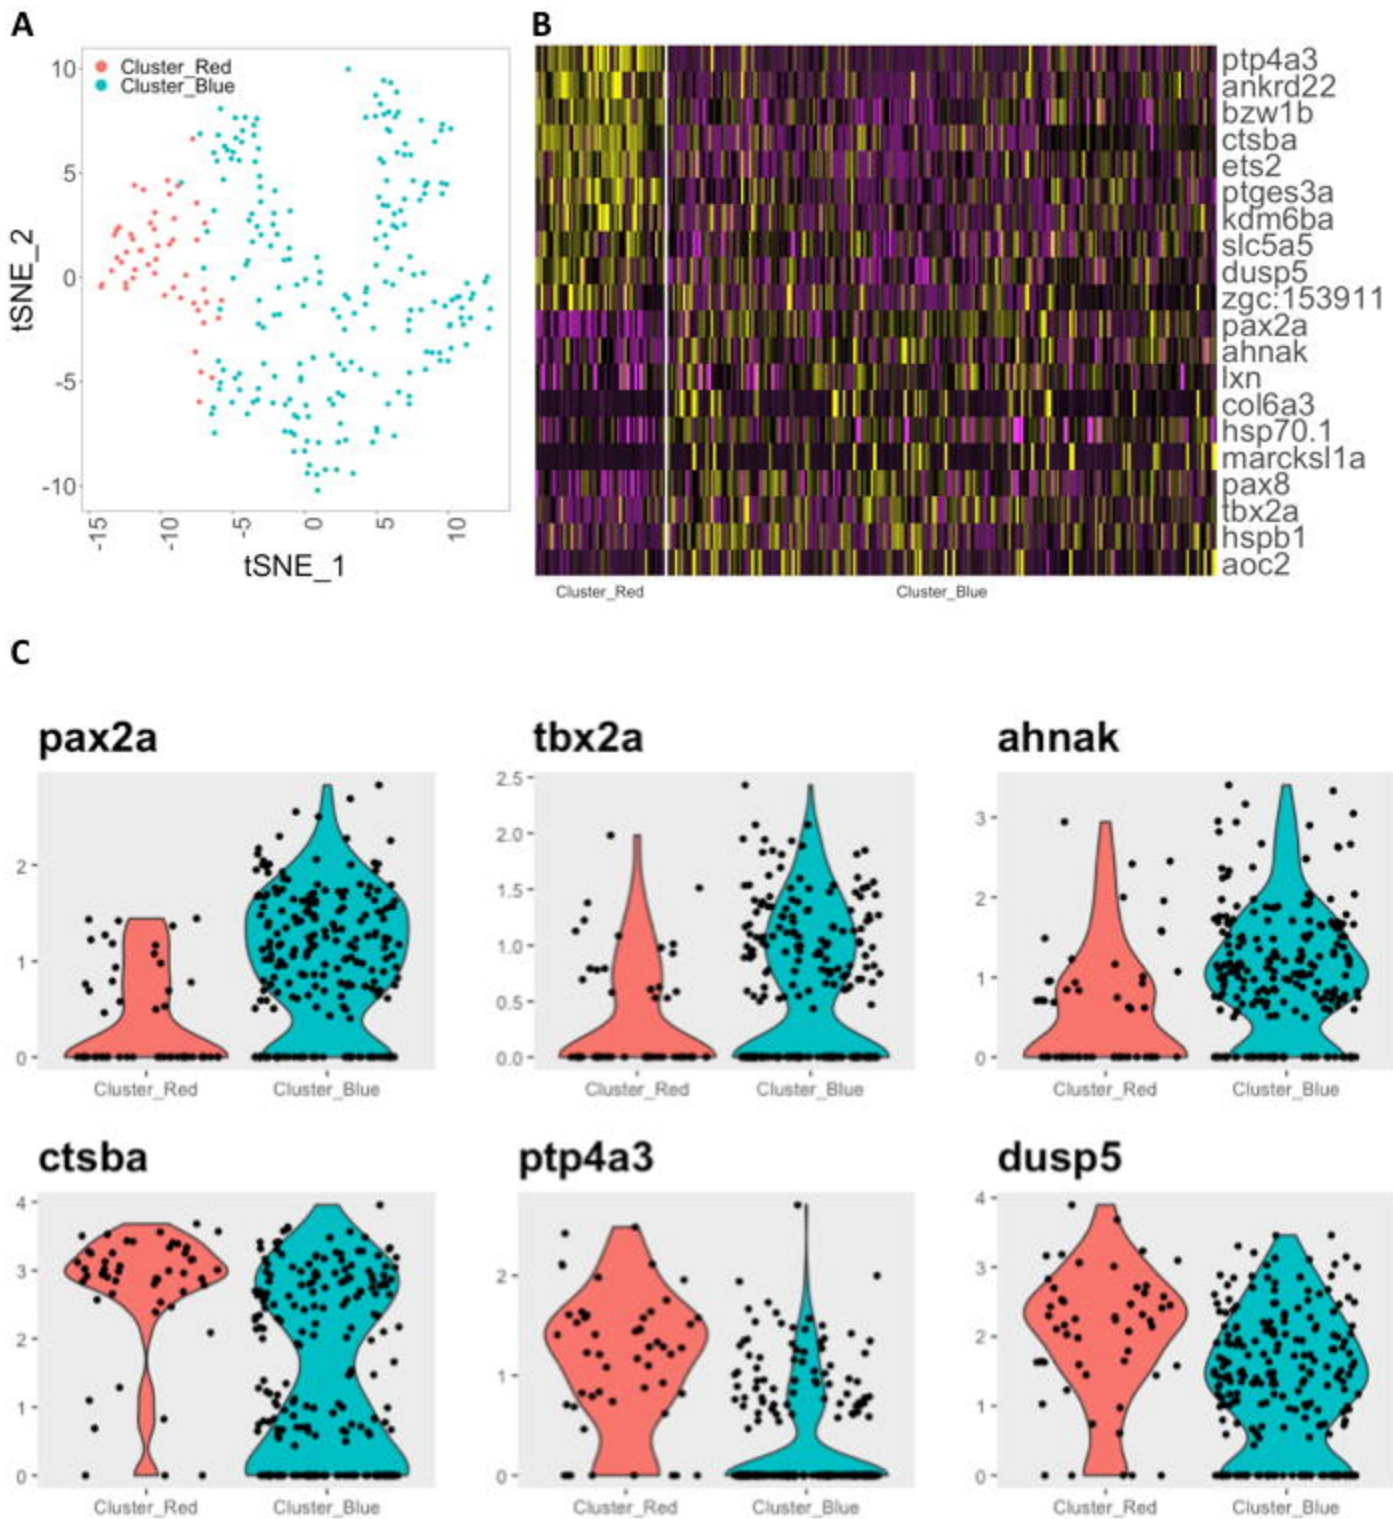

## Figure 5

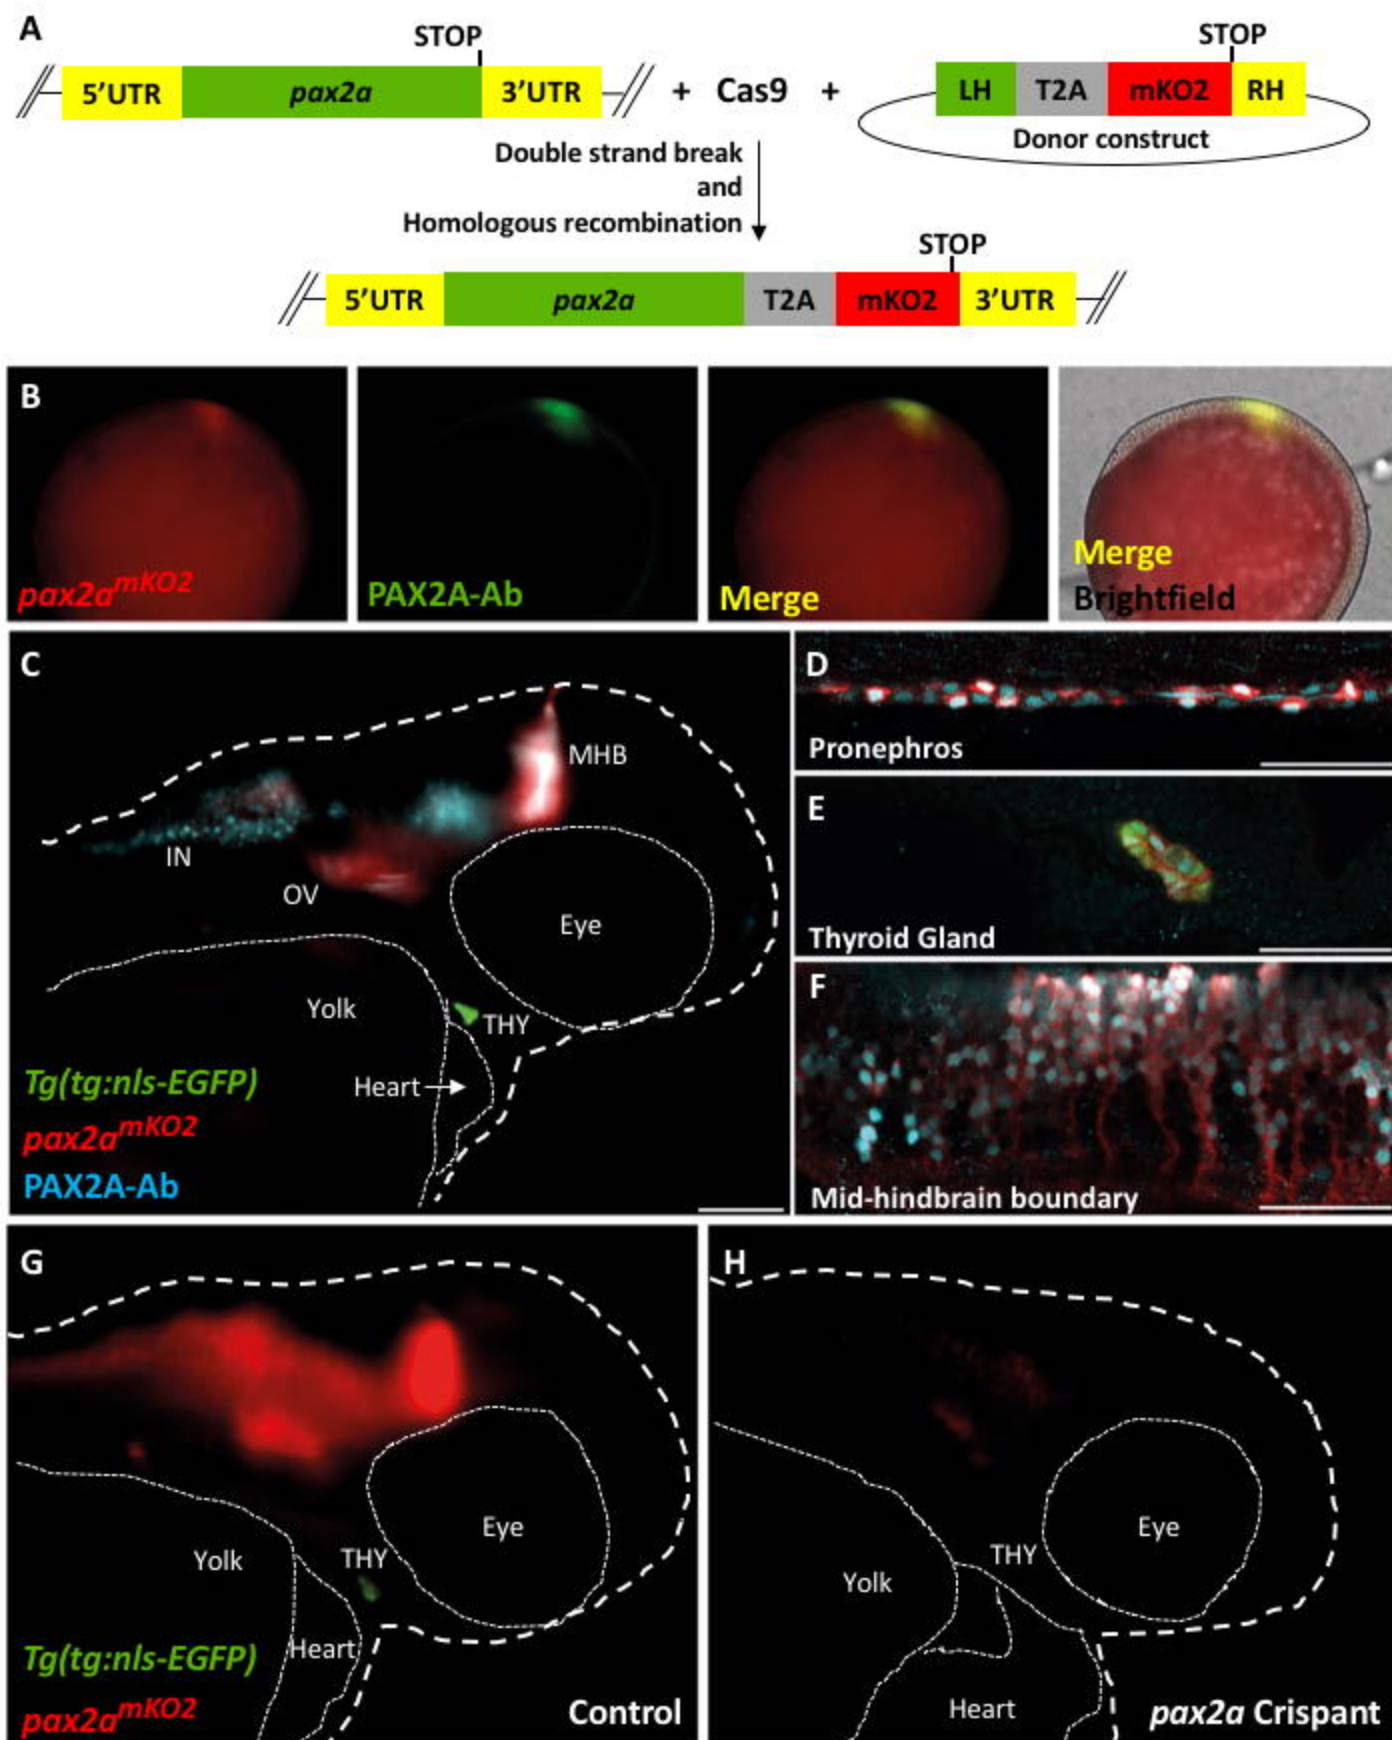



## Figure 6

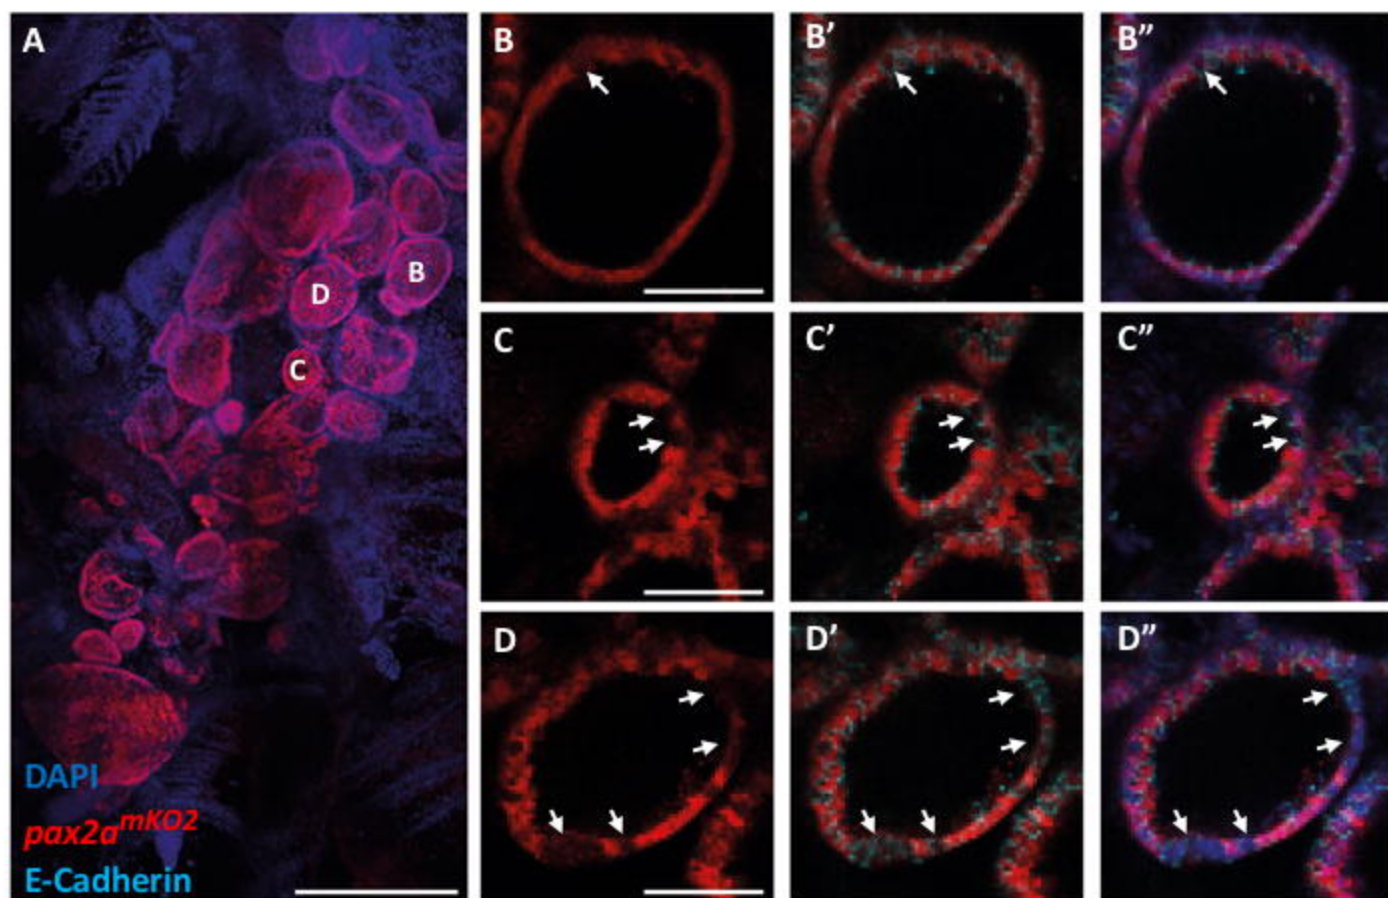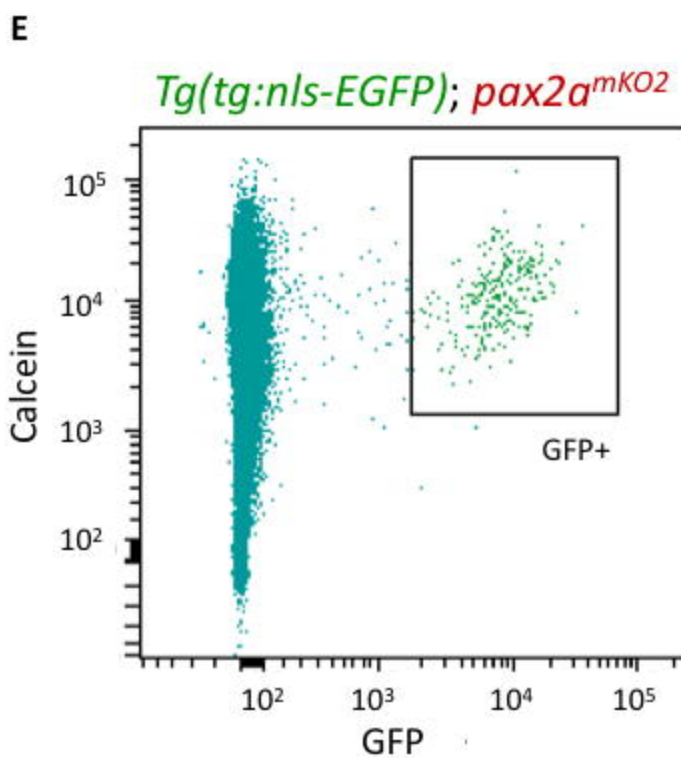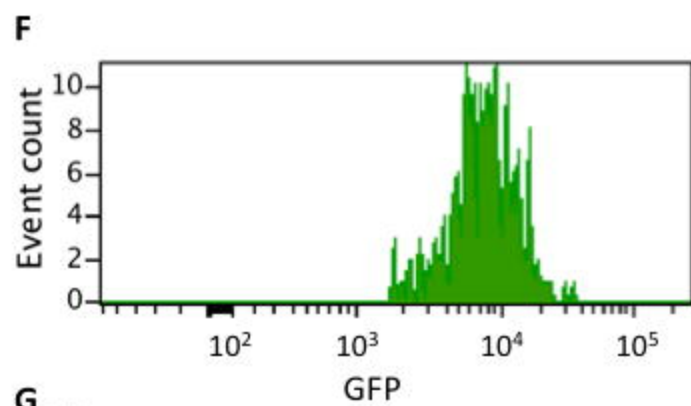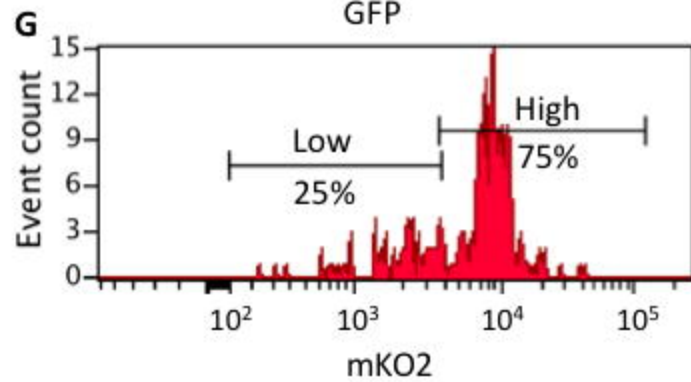

Source: https://www.biorxiv.org/content/10.1101/2020.01.13.891630v1.full.pdf
